# Supplementary material for: Enhancing the thermoelectric power factor of Sr0.9Nd0.1TiO3 through control of the nanostructure and microstructure
Source: Royal Society of Chemistry journal article supplement (doi:10.1039/c8ta07861k), 2018-01-01
Supplement: c8ta07861k1.pdf [file c8ta07861k1.pdf]

## Supplementary Information

### Enhancing the Thermoelectric Power Factor of $\text{Sr}_{0.9}\text{Nd}_{0.1}\text{TiO}_3$ through Control of the Nanostructure and Microstructure

D. Ekren <sup>a</sup>, A. Golinia <sup>a</sup>, F. Azough <sup>a</sup>, S. J. Day <sup>b</sup>,

D. Hernandez. Maldonado <sup>c</sup>, D.M. Kepaptsoglou <sup>c</sup>, Q. M. Ramasse <sup>c</sup>, R. Freer <sup>a</sup>

<sup>a</sup> School of Materials, University of Manchester, Manchester, M13 9PL, UK.

<sup>b</sup> Diamond Light Source, Harwell Science and Innovation Campus, Oxfordshire, OX11 0DE, UK

<sup>c</sup> SuperSTEM Laboratory, STFC Daresbury Campus, Daresbury WA4 4AD, U.K.

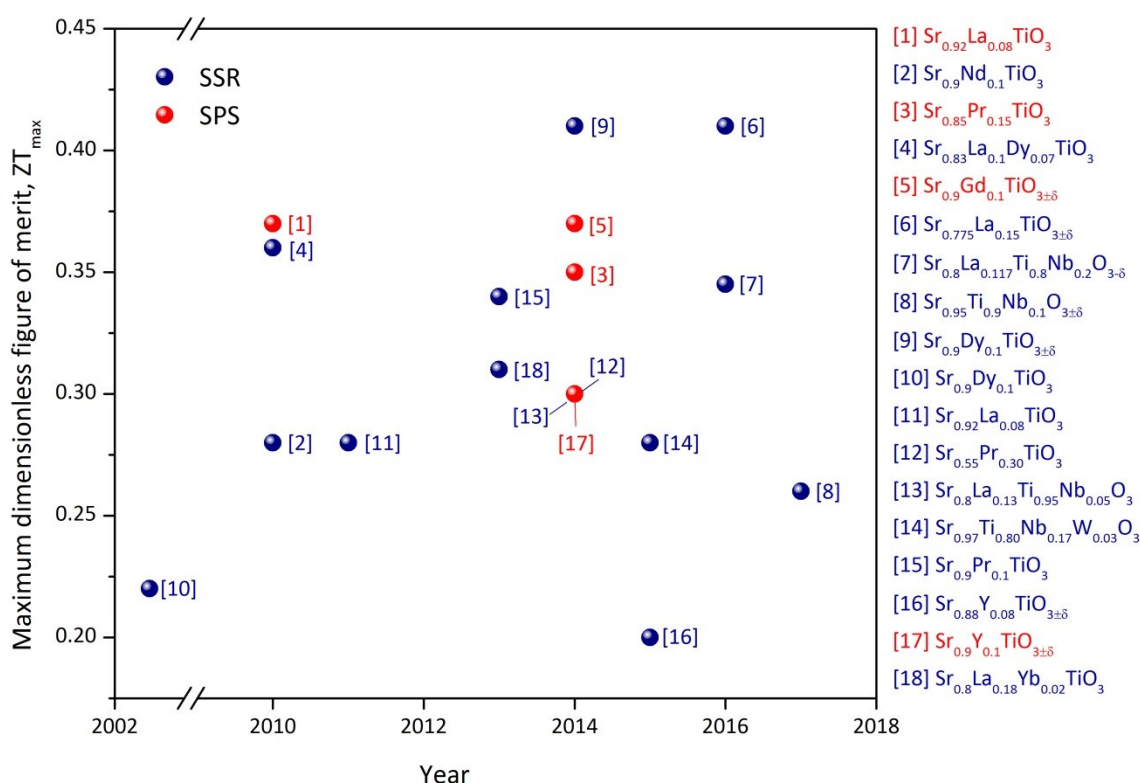

**Figure S.1** Thermoelectric dimensionless figure of merit of  $\text{SrTiO}_3$  ceramics prepared with different A-site and B-site dopants using solid state reaction (SSR) and spark plasma sintering (SPS)<sup>1-18</sup>

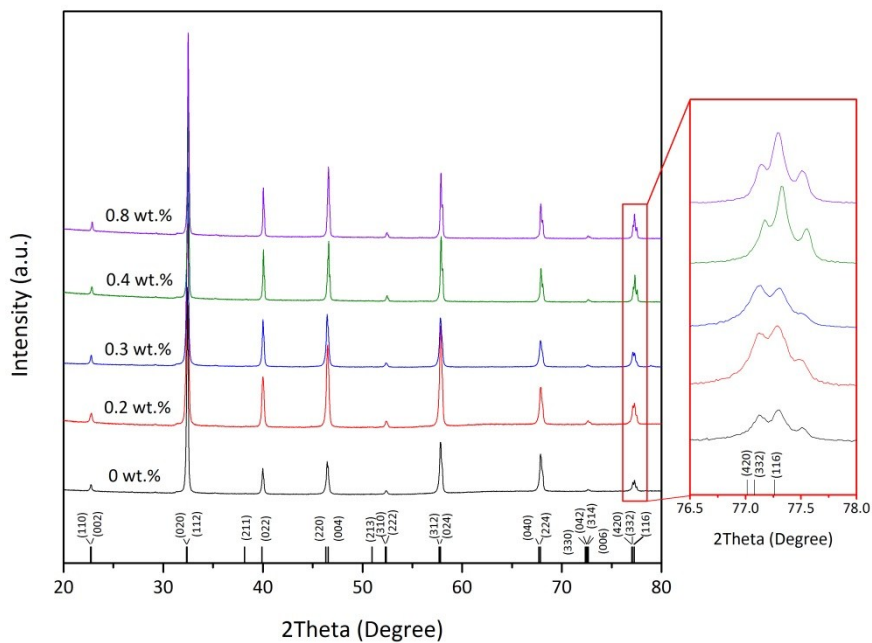

**Figure S.2** X-Ray diffraction patterns for  $Sr_{0.9}Nd_{0.1}TiO_3$  samples prepared with different amounts of  $ZrO_2$

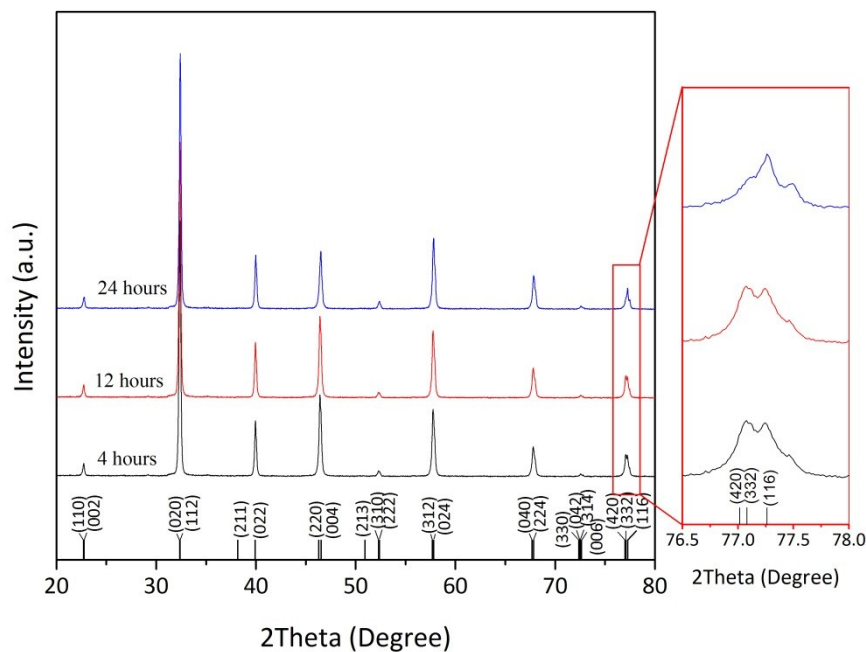

**Figure S.3** X-Ray diffraction patterns for 3Z samples illustrating the effect of sintering time.

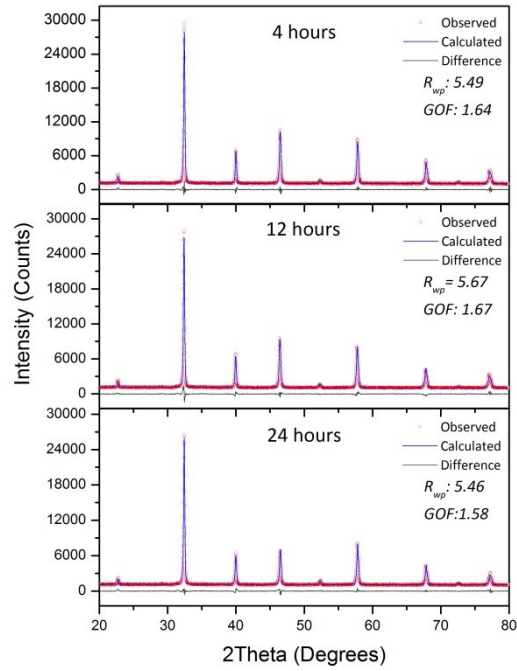

**Figure S.4** Full profile Rietveld refinement from laboratory XRD data ( $\lambda=1.540598 \text{ \AA}$ ) for 3Z samples sintered for 4-24 hours

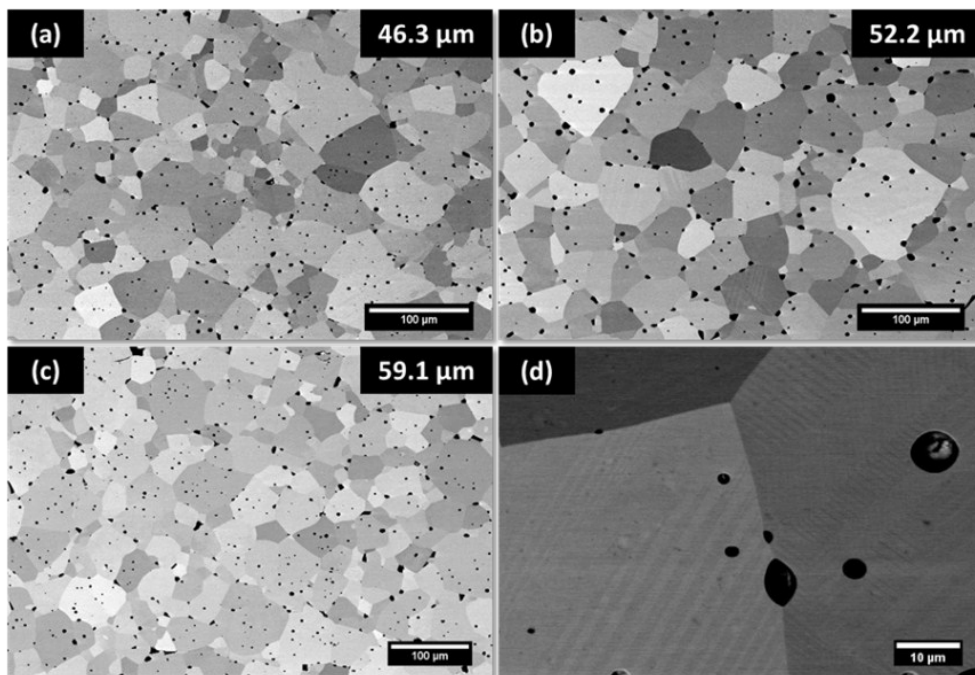

**Figure S.5** BSE-SEM micrographs for 3Z samples after (a) 4 hours, (b) 12 hours and (c-d) 24 hours of sintering. The values for the average grain size in shown in the top right inset of the figures.

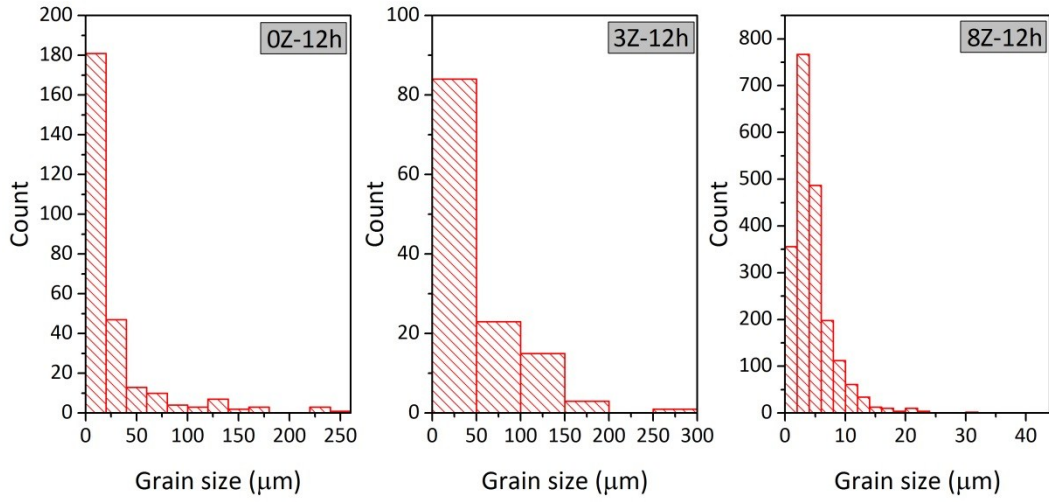

**Figure S.6** Grain size distribution data obtained from multiple SEM micrographs for 0Z-12h, 3Z-12h and 8Z-12 samples

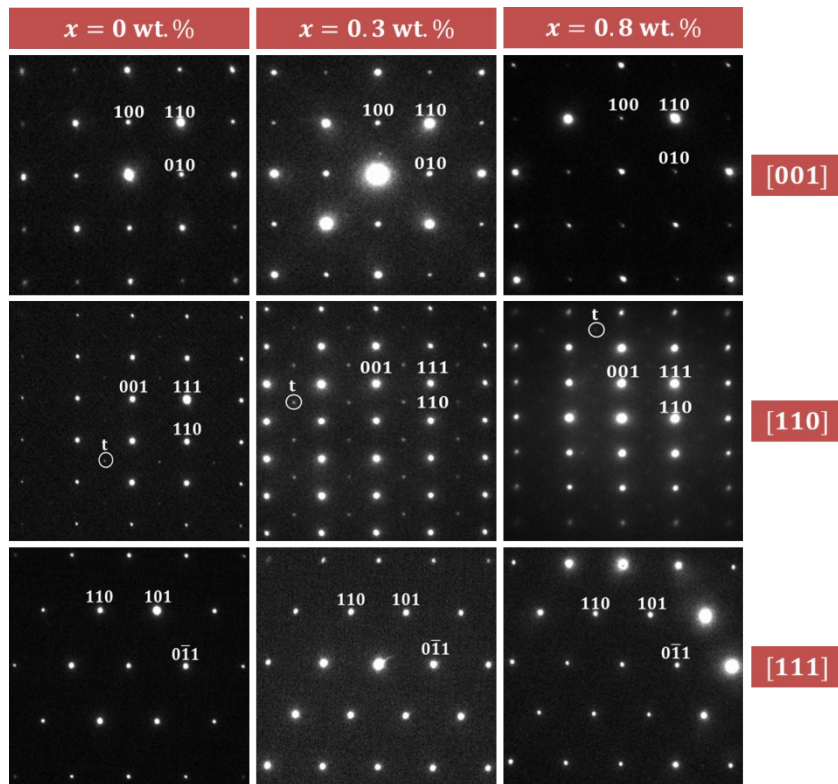

**Figure S.7** SAED patterns along major zone axes for 0.5 wt%  $B_2O_3$  doped  $Sr_{0.9}Nd_{0.1}TiO_3$  samples co-doped with different amounts of  $ZrO_2$

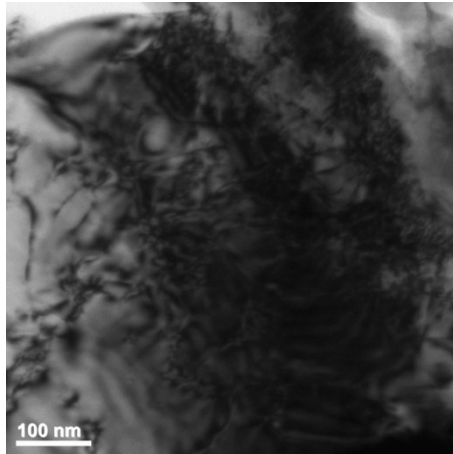

**Figure S.8** Low magnification TEM data showing high density of dislocations in 3Z-12h sample without  $ZrO_2$  addition

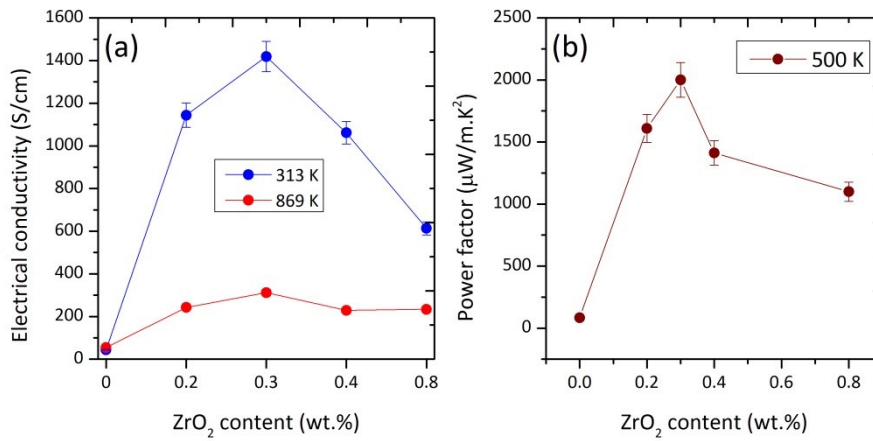

**Figure S.9** (a) Electrical conductivity at 313 and 869 K, and (b) power factor at 500 K with respect to  $ZrO_2$  content.

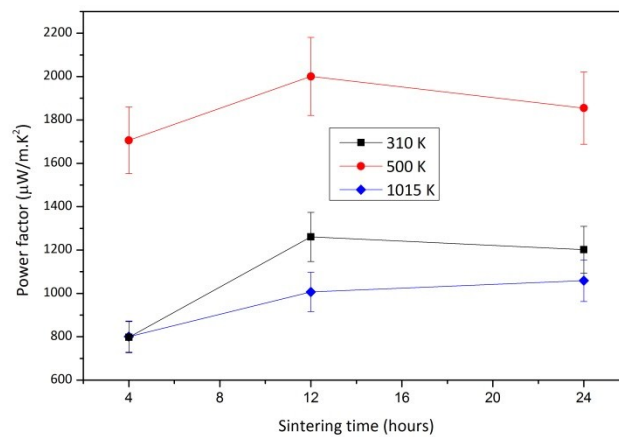

**Figure S.10** Measurement temperature (310, 500 and 1015 K) and sintering time dependence of power factor for 3Z-12 samples

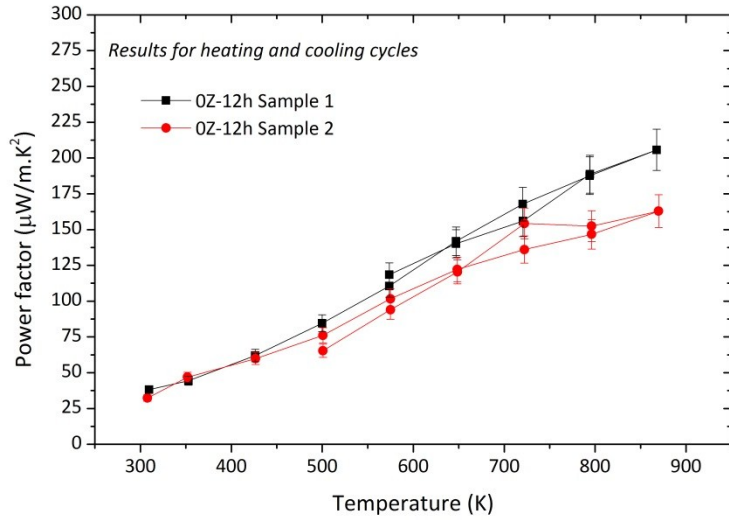

**Figure S. 11** Thermoelectric power factor for two different 0Z-12h samples during heating and cooling cycles of measurement

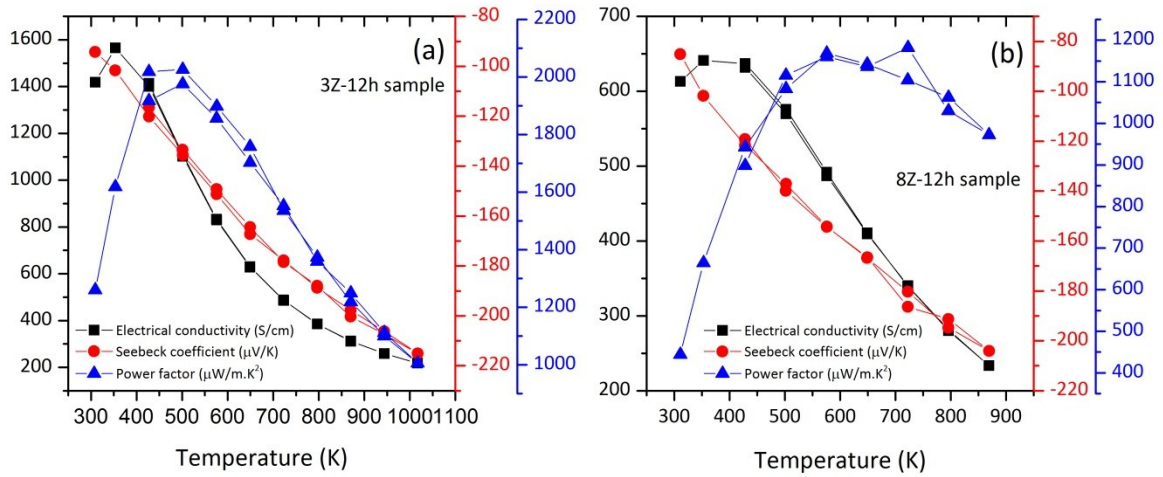

**Figure S.12** Heating and cooling cycle data for electrical conductivity, the Seebeck coefficients and power factor data for 3Z-12h and 8Z-12h samples

**Table S.1** Structural parameters and Ti-O bond lengths for  $Sr_{0.9}Nd_{0.1}TiO_3$  samples co-doped with 0.5 wt.%  $B_2O_3$  and  $x$  different amounts of  $ZrO_2$  from SXPB data ( $\lambda=0.825939(10)$  Å).

| ZrO <sub>2</sub> content (wt.%) | 0              | 0.3            | 0.8            |
|---------------------------------|----------------|----------------|----------------|
| <b>Space Group</b>              | <i>I4/mcm</i>  | <i>I4/mcm</i>  | <i>I4/mcm</i>  |
| <b>R<sub>wp</sub>/GOF</b>       | 12.84/1.45     | 4.85/3.18      | 13.69/1.67     |
| <b>Lattice Parameters</b>       |                |                |                |
| <b>a (Å)</b>                    | 5.518449(2)    | 5.518705(3)    | 5.521464(2)    |
| <b>c (Å)</b>                    | 7.820044(5)    | 7.820201(7)    | 7.823195(5)    |
| <b>V (Å<sup>3</sup>)</b>        | 238.1460(3)    | 238.1729(4)    | 238.5024(2)    |
| <b>Sr/Nd</b>                    |                |                |                |
| <b>X / Y / Z</b>                | 0 / 0.5 / 0.25 | 0 / 0.5 / 0.25 | 0 / 0.5 / 0.25 |
| <b>b<sub>eq</sub></b>           | 0.003(2)       | 0.079(3)       | 0.090(2)       |
| <b>Occupancy</b>                | 0.9/0.1        | 0.9/0.1        | 0.9/0.1        |
| <b>Ti</b>                       |                |                |                |
| <b>X / Y / Z</b>                | 0 / 0 / 0      | 0 / 0 / 0      | 0 / 0 / 0      |
| <b>b<sub>eq</sub></b>           | 0.224(2)       | 0.073(4)       | 0.172(3)       |
| <b>Occupancy</b>                | 1              | 1              | 1              |
| <b>O1</b>                       |                |                |                |
| <b>X / Y / Z</b>                | 0 / 0 / 0.25   | 0 / 0 / 0.25   | 0 / 0 / 0.25   |
| <b>b<sub>eq</sub></b>           | 0.248(17)      | 0.200(30)      | 0.400(20)      |
| <b>Occupancy</b>                | 1              | 1              | 1              |
| <b>O2</b>                       |                |                |                |
| <b>X</b>                        | 0.23330(12)    | 0.23147(19)    | 0.23379(13)    |
| <b>Y</b>                        | 0.73330(12)    | 0.73147(19)    | 0.73379(13)    |
| <b>Z</b>                        | 0              | 0              | 0              |
| <b>b<sub>eq</sub></b>           | 0.179(11)      | 0.300(20)      | 0.335(16)      |
| <b>Occupancy</b>                | 1              | 1              | 1              |
| <b>Bond lengths</b>             |                |                |                |
| <b>Ti-O1</b>                    | 1.95501        | 1.95505        | 1.95579        |
| <b>Ti-O2</b>                    | 1.95584        | 1.95469        | 1.95626        |

*Table S.2 Thermoelectric Power factors for SrTiO<sub>3</sub> based thermoelectric oxides*

| Composition                                                                                                                                      | Sample characteristics | PF <sub>max</sub><br>( $\mu\text{W/m.K}^2$ ) | Temperature<br>(K) | Reference    |
|--------------------------------------------------------------------------------------------------------------------------------------------------|------------------------|----------------------------------------------|--------------------|--------------|
| <b>A-site doping</b>                                                                                                                             |                        |                                              |                    |              |
| Sr <sub>1-x</sub> La <sub>x</sub> TiO <sub>3</sub>                                                                                               | Single-crystal         | 3600                                         | 300                | 19           |
| Sr <sub>0.9</sub> Nd <sub>0.1</sub> TiO <sub>3</sub>                                                                                             | Polycrystalline        | 1690                                         | 423                | 2            |
| Sr <sub>0.9</sub> Pr <sub>0.1</sub> TiO <sub>3</sub>                                                                                             | Polycrystalline        | 1400                                         | 670                | 15           |
| Sr <sub>0.9</sub> Nd <sub>0.1</sub> TiO <sub>3-<math>\delta</math></sub>                                                                         | Polycrystalline        | 1550                                         | 440                | 9            |
| Sr <sub>0.85</sub> Pr <sub>0.15</sub> TiO <sub>3</sub>                                                                                           | Polycrystalline        | 1320                                         | 773                | 20           |
| Sr <sub>0.9</sub> Gd <sub>0.1</sub> TiO <sub>3-<math>\delta</math></sub>                                                                         | Polycrystalline        | 1600                                         | 570                | 5            |
| Sr <sub>0.91</sub> La <sub>0.09</sub> TiO <sub>3-<math>\delta</math></sub>                                                                       | Polycrystalline        | 1352                                         | 500                | 21           |
| Sr <sub>0.94</sub> Y <sub>0.04</sub> TiO <sub>3-<math>\delta</math></sub>                                                                        | Polycrystalline        | 1164                                         | 423                | 16           |
| Sr <sub>0.9</sub> Nd <sub>0.1</sub> TiO <sub>3<math>\pm\delta</math></sub><br>+ 0.5 wt% B <sub>2</sub> O <sub>3</sub> + 0.3 wt% ZrO <sub>2</sub> | Polycrystalline        | 2000                                         | 500                | * This study |
| <b>B-site doping</b>                                                                                                                             |                        |                                              |                    |              |
| SrTi <sub>0.9</sub> Ta <sub>0.1</sub> O <sub>3-<math>\delta</math></sub>                                                                         | Polycrystalline        | 1420                                         | 470                | 22           |
| SrTi <sub>0.9</sub> Nb <sub>0.1</sub> O <sub>3</sub>                                                                                             | Polycrystalline        | 1450                                         | 523                | 23           |
| <b>Dual doping</b>                                                                                                                               |                        |                                              |                    |              |
| Sr <sub>0.83</sub> La <sub>0.10</sub> Dy <sub>0.07</sub> TiO <sub>3</sub>                                                                        | Polycrystalline        | 1237                                         | 700                | 4            |
| Sr <sub>0.95</sub> La <sub>0.05</sub> Ti <sub>0.95</sub> Nb <sub>0.05</sub> O <sub>3</sub>                                                       | Polycrystalline        | 2370                                         | 473                | 24           |
| Sr <sub>0.80</sub> La <sub>0.13</sub> Ti <sub>0.95</sub> Nb <sub>0.05</sub> O <sub>3</sub>                                                       | Polycrystalline        | 1300                                         | 525                | 13           |
| Sr <sub>0.85</sub> La <sub>0.075</sub> Sm <sub>0.075</sub> TiO <sub>3-<math>\delta</math></sub>                                                  | Polycrystalline        | 1400                                         | 573                | 25           |
| Sr <sub>0.9</sub> La <sub>0.1</sub> Ti <sub>0.9</sub> Nb <sub>0.1</sub> O <sub>3</sub>                                                           | Polycrystalline        | 1700                                         | 623                | 26           |
| <b>A-site deficient</b>                                                                                                                          |                        |                                              |                    |              |
| Sr <sub>0.94</sub> Ti <sub>0.80</sub> Nb <sub>0.2</sub> O <sub>3</sub>                                                                           | Polycrystalline        | 1625                                         | 450                | 12           |
| Sr <sub>0.775</sub> La <sub>0.15</sub> TiO <sub>3-<math>\delta</math></sub>                                                                      | Polycrystalline        | 1400                                         | 473                | 6            |
| Sr <sub>0.95</sub> Ti <sub>0.9</sub> Nb <sub>0.1</sub> O <sub>3-<math>\delta</math></sub>                                                        | Polycrystalline        | 1600                                         | 450                | 8            |
| Sr <sub>0.75</sub> La <sub>0.1</sub> Dy <sub>0.1</sub> TiO <sub>3</sub>                                                                          | Polycrystalline        | 1216                                         | 373                | 27           |
| <b>Inclusion/Additive</b>                                                                                                                        |                        |                                              |                    |              |
| SrTi <sub>0.85</sub> Nb <sub>0.15</sub> O <sub>3</sub> + 3wt% YSZ                                                                                | Polycrystalline        | 720                                          | 400                | 28           |
| Sr <sub>0.9</sub> La <sub>0.1</sub> TiO <sub>3</sub> + 0.6wt%<br>Graphene                                                                        | Polycrystalline        | 2500                                         | 330                | 29           |

## References

- 1 A. Kikuchi, N. Okinaka and T. Akiyama, *Scr. Mater.*, 2010, 63, 407–410.
- 2 J. Liu, C. L. Wang, W. B. Su, H. C. Wang, J. C. Li, J. L. Zhang and L. M. Mei, *J. Alloys Compd.*, 2010, 492, 54–56.



- 3 A. M. Dehkordi, S. Bhattacharya, T. Darroudi, G. Jennifer W, U. Schwingenschlogl, H. N. Alshareef and T. M. Tritt, *Chem. Mater.*, 2014, 26, 2478–2485.
- 4 H. C. Wang, C. L. Wang, W. B. Su, J. Liu, Y. Zhao, H. Peng, J. L. Zhang, M. L. Zhao, J. C. Li, N. Yin and L. M. Mei, *Mater. Res. Bull.*, 2010, 45, 809–812.
- 5 L. Li, Y. Liu, X. Qin, D. Li, J. Zhang, C. Song and L. Wang, *J. Alloys Compd.*, 2014, 588, 562–567.
- 6 Z. Lu, H. Zhang, W. Lei, D. C. Sinclair and I. M. Reaney, *Chem. Mater.*, 2016, 28, 925–935.
- 7 D. Srivastava, C. Norman, F. Azough, M. C. Schäfer, E. Guilmeau, D. Kepaptsoglou, Q. M. Ramasse, G. Nicotra and R. Freer, *Phys. Chem. Chem. Phys.*, 2016, 26475–26486.
- 8 A. V. Kovalevsky, M. H. Aguirre, S. Populoh, S. G. Patrício, N. M. Ferreira, S. M. Mikhalev, D. P. Fagg, A. Weidenkaff and J. R. Frade, *J. Mater. Chem. A*, 2017, 5, 3909–3922.
- 9 A. V. Kovalevsky, A. A. Yaremchenko, S. Populoh, P. Thiel, D. P. Fagg, A. Weidenkaff and J. R. Frade, *Phys. Chem. Chem. Phys.*, 2014, 16, 26946–54.
- 10 H. Muta, K. Kurosaki and S. Yamanaka, *J. Alloys Compd.*, 2003, 350, 292–295.
- 11 P.-P. Shang, B.-P. Zhang, Y. Liu, J.-F. Li and H.-M. Zhu, *J. Electron. Mater.*, 2011, 40, 926–931.
- 12 A. V. Kovalevsky, A. A. Yaremchenko, S. Populoh, A. Weidenkaff and J. R. Frade, *J. Phys. Chem. C*, 2014, 118, 4596–4606.
- 13 S. R. Popuri, A. J. M. Scott, R. A. Downie, M. A. Hall, E. Suard, R. Decourt, M. Pollet and J.-W. G. Bos, *RSC Adv.*, 2014, 4, 33720–33723.
- 14 A. V. Kovalevsky, S. Populoh, S. G. Patrício, P. Thiel, M. C. Ferro, D. P. Fagg, J. R. Frade and A. Weidenkaff, *J. Phys. Chem. C*, 2015, 119, 4466–4478.
- 15 A. V. Kovalevsky, A. A. Yaremchenko, S. Populoh, A. Weidenkaff and J. R. Frade, *J. Appl. Phys.*, 2013, 113, 0–8.
- 16 C. Chen, T. Zhang, R. Donelson, T. T. Tan and S. Li, *J. Alloys Compd.*, 2015, 629, 49–54.
- 17 S. Bhattacharya, A. Mehdizadeh Dehkordi, S. Tennakoon, R. Adebisi, J. R. Gladden, T. Darroudi, H. N. Alshareef and T. M. Tritt, *J. Appl. Phys.*, 2014, 115, 223712.
- 18 J. Liu, C. L. Wang, Y. Li, W. B. Su, Y. H. Zhu, J. C. Li and L. M. Mei, *J. Appl. Phys.*, 2013, 114, 223714.

- 19 T. Okuda, K. Nakanishi, S. Miyasaka and Y. Tokura, *Phys. Rev. B*, 2001, 63, 113104.
- 20 A. M. Dehkordi, S. Bhattacharya, J. He, H. N. Alshareef and T. M. Tritt, *Appl. Phys. Lett.*, 2014, 104, 193902.
- 21 K. Park, J. S. Son, S. I. Woo, K. Shin, M.-W. Oh, S.-D. Park and T. Hyeon, *J. Mater. Chem. A*, 2014, 2, 4217.
- 22 A. A. Yaremchenko, S. Populoh, S. G. Patricio, J. Macías, P. Thiel, D. P. Fagg, A. Weidenkaff, J. R. Frade and A. V. Kovalevsky, *Chem. Mater.*, 2015, 27, 4995–5006.
- 23 B. Zhang, J. Wang, T. Zou, S. Zhang, X. Yaer, N. Ding, C. Liu, L. Miao, Y. Li and Y. Wu, *J. Mater. Chem. C*, 2015, 3, 11406–11411.
- 24 T. Teranishi, Y. Ishikawa, H. Hayashi, A. Kishimoto, M. Katayama and Y. Inada, *J. Am. Ceram. Soc.*, 2013, 96, 2852–2856.
- 25 A. C. Iyasara, W. L. Schmidt, R. Boston, D. C. Sinclair and I. M. Reaney, *Mater. Today Proc.*, 2017, 4, 12360–12367.
- 26 J. Wang, B. Y. Zhang, H. J. Kang, Y. Li, X. Yaer, J. F. Li, Q. Tan, S. Zhang, G. H. Fan, C. Y. Liu, L. Miao, D. Nan, T. M. Wang and L. D. Zhao, *Nano Energy*, 2017, 35, 387–395.
- 27 J. Han, Q. Sun and Y. Song, *J. Alloys Compd.*, 2017, 705, 22–27.
- 28 N. Wang, H. Li, Y. Ba, Y. Wang, C. Wan, K. Fujinami and K. Koumoto, *J. Electron. Mater.*, 2010, 39, 1777–1781.
- 29 Y. Lin, C. Norman, D. Srivastava, F. Azough, L. Wang, M. Robbins, K. Simpson, R. Freer and I. A. Kinloch, *ACS Appl. Mater. Interfaces*, 2015, 7, 15898–15908.
